# Supplementary material for: Efficient extraction based on a polydimethylsiloxane/bimetallic ZnCo-MOF carbonization sponge coupled with GC-MS for the rapid analysis of volatile compounds in cumin
Source: Royal Society of Chemistry journal article supplement (doi:10.1039/d3ay01889j), 2024-01-01
Supplement: d3ay01889j1.pdf [file d3ay01889j1.pdf]

## Supplementary Material

### **Efficient extraction based on polydimethylsiloxane/bimetallic ZnCo-MOF carbonization sponge coupled with GC-MS for rapid analysis of volatile compounds in cumin**

**Dandan Li<sup>a</sup>, Jihong Fu<sup>a\*</sup>, Shuxian Ren<sup>a</sup>, Xinxing Jiang<sup>a</sup>**

*<sup>a</sup> Key Laboratory of Oil and Gas Fine Chemicals Ministry of Education & Xinjiang Uyghur Autonomous Region, School of Chemical Engineering and Technology, Xinjiang University, Urumqi 830017, Xinjiang, China*

*<sup>b</sup>Corresponding author: Jihong Fu. Phone: +86 991 8582966. Email: fjh.518@163.com*

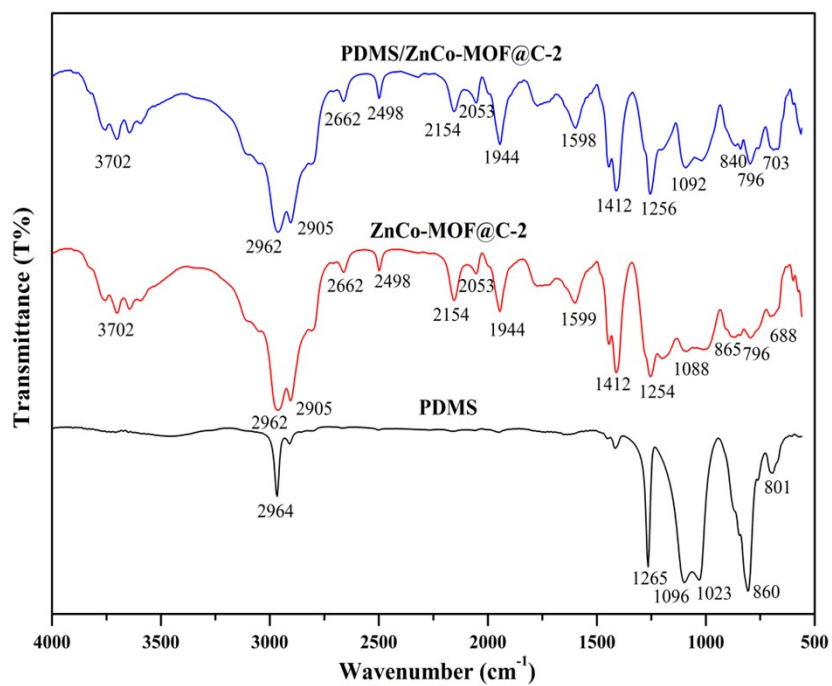

Fig. S1 FT-IR spectra of the as-synthesized materials.

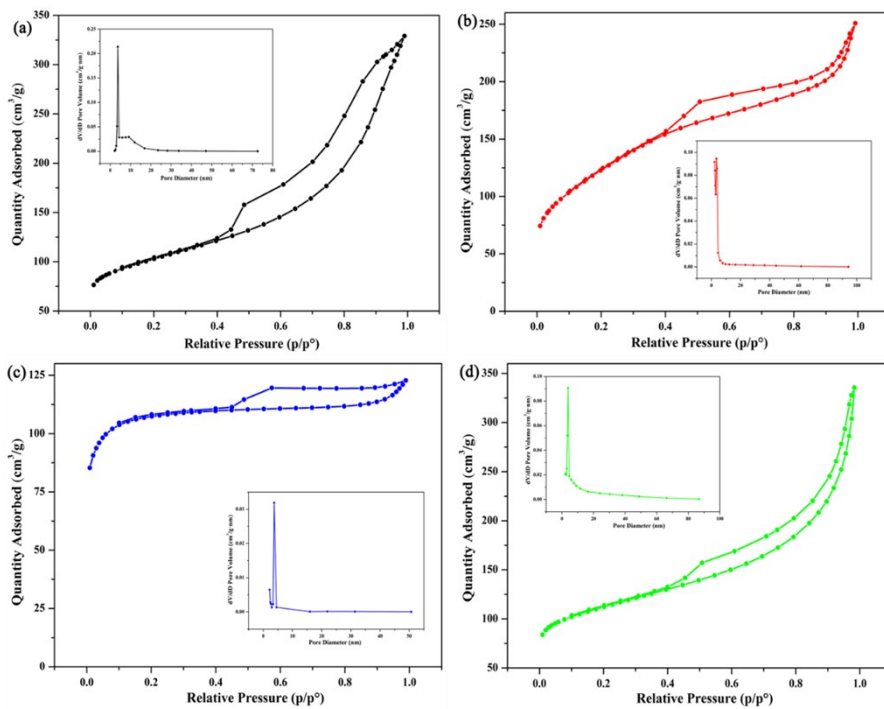

**Fig. S2**  $N_2$  adsorption-desorption isotherms and pore size distribution of ZnCo-MOF@C-1 (a) 、 ZnCo-MOF@C-2 (b) 、 ZnCo-MOF@C-3 (c) and ZnCo-MOF@C-4 (d).

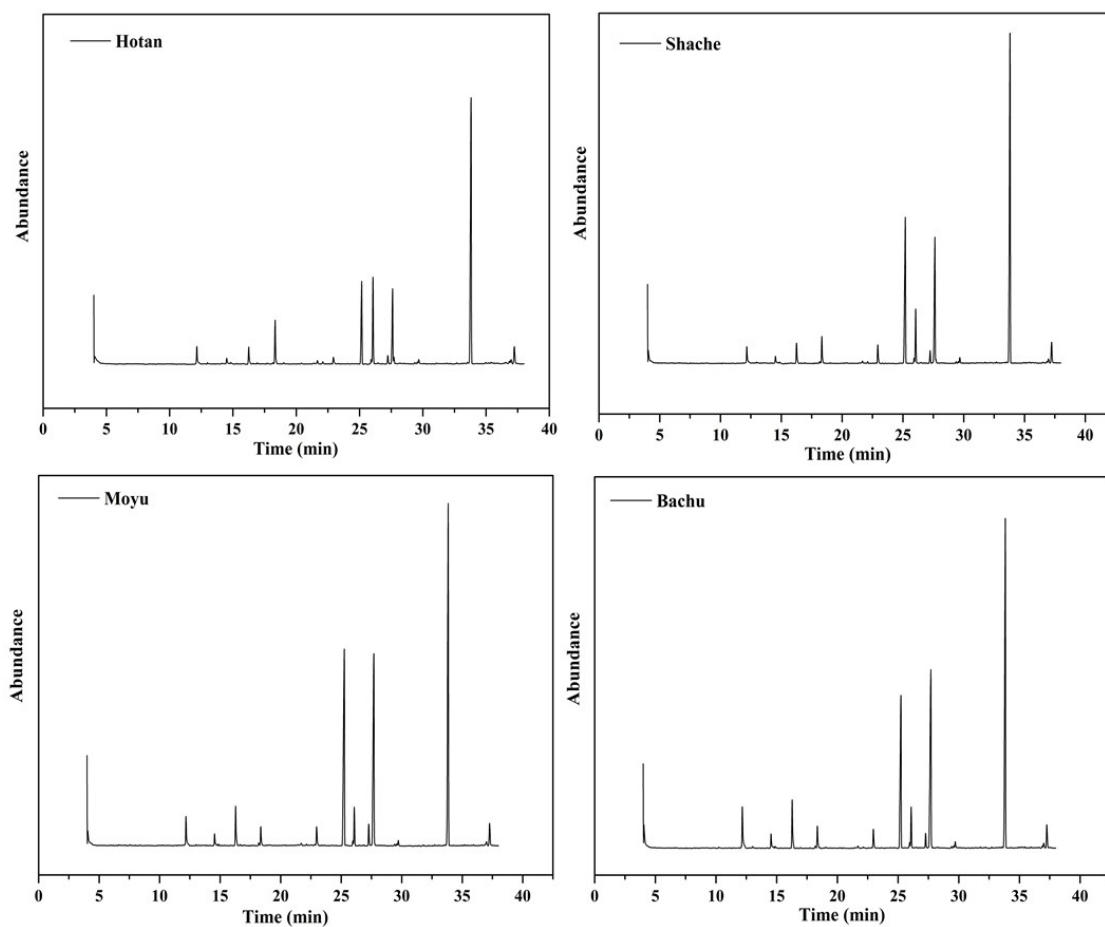

**Fig. S3** The total ion chromatograms of volatile compounds in cumin from different origins.
